# Supplementary material for: Effects of a leaf spring structured midsole on joint mechanics and lower limb muscle forces in running
Source: PLoS One. 2017 Feb 24;12(2):e0172287. doi: 10.1371/journal.pone.0172287 (PMC5325235; doi:10.1371/journal.pone.0172287)
Supplement: S1 File — (XLS) [file pone.0172287.s001.xls]

## Sheet: Gesamt
LEAF		foot shift [mm]		p hip gen [W/kg]	p hip abs [W/kg]	p knee gen [W/kg]	p knee abs [W/kg]	p ankle gen [W/kg]	p ankle abs [W/kg]		w hip gen [J/kg]	w hip abs [J/kg]	w knee gen [J/kg]	w knee abs [J/kg]	w ankle gen [J/kg]	w ankle abs [J/kg]
P1		20.9863		2.02082	-5.0914	10.1595	-17.2067	16.4653	-11.6466		0.121727	-0.346668	0.583708	-0.777389	0.852963	-0.669819
P2		19.1249		2.02015	-2.4101	4.78898	-11.4248	10.7257	-8.03054		0.0977398	-0.247727	0.344266	-0.496954	0.649834	-0.437019
P3		21.7553		2.01255	-4.97839	9.44461	-14.1695	11.7413	-8.84796		0.113597	-0.337793	0.635827	-0.727664	0.614314	-0.535367
P4		17.5517		2.09442	-3.01787	7.58356	-14.1803	12.7557	-8.75961		0.103241	-0.392692	0.49059	-0.645509	0.776906	-0.56191
P5		17.3184		3.35609	-4.67231	7.13348	-14.9934	15.504	-10.6528		0.211971	-0.288234	0.389761	-0.655971	0.844038	-0.610466
P6		16.3795		2.14969	-3.10015	8.03882	-14.0783	14.2837	-8.98646		0.0817978	-0.369102	0.469342	-0.635091	0.769513	-0.52181
P7		12.5344		0.730943	-1.71966	8.60119	-13.5337	11.7207	-9.09794		0.0272186	-0.363204	0.571184	-0.664386	0.613258	-0.638063
P8		23.8072		3.02697	-2.69545	5.53667	-10.4885	13.3114	-10.0196		0.151464	-0.221242	0.24401	-0.449361	0.673378	-0.516006
P9		27.0422		0.698006	-1.54202	9.54631	-13.0607	11.1862	-8.59084		0.019625	-0.399153	0.619904	-0.602165	0.659508	-0.553834
mean		19.6111		2.01218	-3.24748	7.87034	-13.6818	13.0771	-9.4036		0.103154	-0.329535	0.483177	-0.628277	0.717079	-0.560477
std		4.32397		0.882491	1.35782	1.82538	1.95218	1.99101	1.14608		0.0590103	0.0632673	0.134777	0.102753	0.0948664	0.0705917
se		1.44132		0.294164	0.452607	0.608459	0.650726	0.663669	0.382025		0.0196701	0.0210891	0.0449256	0.0342509	0.0316221	0.0235306
FOAM		foot shift [mm]		p hip gen [W/kg]	p hip abs [W/kg]	p knee gen [W/kg]	p knee abs [W/kg]	p ankle gen [W/kg]	p ankle abs [W/kg]		w hip gen [J/kg]	w hip abs [J/kg]	w knee gen [J/kg]	w knee abs [J/kg]	w ankle gen [J/kg]	w ankle abs [J/kg]
P1		12.8322		1.46448	-6.57927	11.2842	-17.1521	18.4297	-11.0716		0.0873642	-0.423923	0.663083	-0.77132	0.930217	-0.647503
P2		9.65293		1.90692	-3.40798	4.65467	-11.0186	12.4848	-8.62243		0.0932999	-0.27423	0.327887	-0.452586	0.738073	-0.463553
P3		9.66982		1.75053	-5.73082	9.64177	-14.3763	12.3063	-8.68707		0.121804	-0.338163	0.687521	-0.76561	0.715635	-0.545894
P4		7.95518		2.15994	-3.84392	8.34808	-13.3197	16.1617	-7.3695		0.106155	-0.463653	0.483537	-0.627116	0.871686	-0.432982
P5		10.1908		3.2825	-5.39435	7.67787	-15.6897	17.8442	-10.9397		0.2172	-0.33186	0.402202	-0.692674	0.930004	-0.613619
P6		11.0196		1.61853	-3.59935	8.15703	-13.7526	16.1085	-9.69664		0.0642999	-0.390988	0.476678	-0.596169	0.862418	-0.551769
P7		11.8509		0.499457	-2.56362	8.6712	-13.278	14.8629	-8.95913		0.017756	-0.425478	0.57288	-0.651649	0.708546	-0.632279
P8		16.6396		4.76826	-4.27927	5.18194	-8.8673	16.9807	-12.4054		0.273613	-0.252203	0.245173	-0.394093	0.825542	-0.630204
P9		19.1653		1.06017	-3.14181	9.55391	-12.8097	12.2546	-10.1267		0.0418896	-0.382147	0.629955	-0.58315	0.737442	-0.647024
mean		12.1085		2.05675	-4.28226	8.13007	-13.3627	15.2704	-9.76424		0.113709	-0.364738	0.498768	-0.61493	0.813285	-0.57387
std		3.62301		1.27194	1.33644	2.1088	2.42312	2.41956	1.54311		0.0824007	0.071249	0.153658	0.128057	0.0902676	0.0807997
se		1.20767		0.423982	0.445481	0.702934	0.807707	0.806519	0.51437		0.0274669	0.0237497	0.0512192	0.0426858	0.0300892	0.0269332
diff(LEAF-FOAM)		foot shift [mm]		p hip gen [W/kg]	p hip abs [W/kg]	p knee gen [W/kg]	p knee abs [W/kg]	p ankle gen [W/kg]	p ankle abs [W/kg]		w hip gen [J/kg]	w hip abs [J/kg]	w knee gen [J/kg]	w knee abs [J/kg]	w ankle gen [J/kg]	w ankle abs [J/kg]
P1		8.15416		0.556339	1.48788	-1.12469	-0.054568	-1.96441	-0.575005		0.034363	0.0772546	-0.0793752	-0.00606965	-0.0772539	-0.0223158
P2		9.47201		0.113222	0.997881	0.134307	-0.406145	-1.75907	0.59189		0.00443992	0.0265029	0.0163793	-0.0443677	-0.0882387	0.0265344
P3		12.0855		0.262022	0.752428	-0.197154	0.206759	-0.56507	-0.160896		-0.00820679	0.000369946	-0.051694	0.0379458	-0.101321	0.0105271
P4		9.59657		-0.0655171	0.826046	-0.764525	-0.860681	-3.40602	-1.39011		-0.0029139	0.0709605	0.0070532	-0.0183929	-0.0947806	-0.128928
P5		7.12761		0.0735934	0.722044	-0.5444	0.696307	-2.34016	0.286875		-0.00522887	0.0436264	-0.0124404	0.0367029	-0.0859659	0.00315349
P6		5.35994		0.531155	0.499193	-0.118216	-0.325721	-1.82473	0.710185		0.0174978	0.0218859	-0.007336	-0.0389219	-0.0929053	0.0299583
P7		0.683527		0.231486	0.843957	-0.0700139	-0.255642	-3.14226	-0.138813		0.00946259	0.062274	-0.00169656	-0.0127371	-0.0952884	-0.00578412
P8		7.16766		-1.74129	1.58382	0.354727	-1.62117	-3.66929	2.38581		-0.122149	0.0309612	-0.0011631	-0.0552678	-0.152164	0.114198
P9		7.87686		-0.362168	1.59979	-0.0076011	-0.250952	-1.06835	1.53583		-0.0222646	-0.0170055	-0.0100507	-0.0190148	-0.0779342	0.0931895
mean		7.50265		-0.0445728	1.03478	-0.259729	-0.319091	-2.19326	0.360642		-0.0105555	0.0352033	-0.0155915	-0.013347	-0.0962058	0.0133926
std		3.18541		0.696579	0.414081	0.466413	0.650246	1.05266	1.12503		0.0448786	0.0317428	0.0304481	0.0328264	0.0224517	0.0698101
se		1.0618		0.232193	0.138027	0.155471	0.216749	0.350887	0.375009		0.0149595	0.0105809	0.0101494	0.0109421	0.0074839	0.02327
%-Veränderung		38.2571		-2.21515	-31.8641	-3.3001	2.33223	-16.7717	-3.83514		-10.2328	-10.6827	-3.22687	2.12438	-13.4163	-2.38949
p-value		0.000105486		0.852553	6.94774e-05	0.133348	0.17919	0.000245544	0.364369		0.500461	0.01043	0.16304	0.257285	1.26674e-06	0.580758
Cohen's d		2.35532		-0.0639882	2.49899	-0.556865	-0.490723	-2.08354	0.320562		-0.235202	1.10902	-0.512068	-0.406594	-4.28501	0.191843
