# Supplementary material for: Effects of a leaf spring structured midsole on joint mechanics and lower limb muscle forces in running
Source: PLoS One. 2017 Feb 24;12(2):e0172287. doi: 10.1371/journal.pone.0172287 (PMC5325235; doi:10.1371/journal.pone.0172287)
Supplement: S2 File — (XLS) [file pone.0172287.s002.xls]

## Sheet: mean muscle force
LEAF	Gluteus maximus [x BW]	Biceps femoris CapLong [x BW]	Rectus femoris [x BW]	Vastus lateralis [x BW]	Vastus medialis [x BW]	Gastocnemius lateralis [x BW]	Gastocnemius medialis [x BW]	Soleus [x BW]	Tibialis anterior [x BW]
P1	0.215904	0.322237	0.481089	1.54465	0.713966	0.283512	0.733401	3.35047	0.101708
P2	0.199743	0.220719	0.362297	1.0802	0.501386	0.241997	0.575271	2.59251	0.0836108
P3	0.178466	0.236914	0.52692	1.69884	0.786753	0.189935	0.404771	3.0208	0.152669
P4	0.118142	0.335297	0.419763	1.18659	0.553601	0.191576	0.514257	2.41371	0.106658
P5	0.22528	0.35026	0.365269	1.20866	0.562669	0.254703	0.685672	2.78391	0.0891584
P6	0.20906	0.206943	0.426922	1.15016	0.534367	0.254	0.703761	2.66858	0.115708
P7	0.178066	0.163855	0.522875	1.33299	0.615369	0.255784	0.687927	2.89009	0.0968479
P8	0.207324	0.252255	0.271356	0.83738	0.389709	0.260894	0.635963	2.37783	0.0988455
P9	0.15673	0.161835	0.53652	1.45955	0.678259	0.225757	0.587896	3.02543	0.0889816
mean	0.187635	0.250035	0.434779	1.27767	0.592898	0.239795	0.614324	2.79148	0.103798
std	0.0338556	0.0712632	0.0907099	0.261478	0.120194	0.0317197	0.105655	0.315848	0.0207874
se	0.0112852	0.0237544	0.0302366	0.0871593	0.0400646	0.0105732	0.0352183	0.105283	0.00692913
FOAM	Gluteus maximus [x BW]	Biceps femoris CapLong [x BW]	Rectus femoris [x BW]	Vastus lateralis [x BW]	Vastus medialis [x BW]	Gastocnemius lateralis [x BW]	Gastocnemius medialis [x BW]	Soleus [x BW]	Tibialis anterior [x BW]
P1	0.214376	0.316481	0.534087	1.67495	0.773337	0.326049	0.803526	3.67086	0.109124
P2	0.187128	0.251817	0.339869	1.04938	0.487258	0.276779	0.611292	2.76423	0.102796
P3	0.186692	0.251812	0.558126	1.8411	0.851023	0.227139	0.457034	3.37673	0.135837
P4	0.12751	0.388309	0.396833	1.19295	0.556924	0.208686	0.544018	2.37387	0.120346
P5	0.23663	0.353731	0.37947	1.28648	0.598488	0.283379	0.709276	3.016	0.0927704
P6	0.197577	0.203622	0.43537	1.15662	0.537002	0.273669	0.708818	2.79043	0.122249
P7	0.178852	0.185486	0.517966	1.34169	0.619001	0.290464	0.750053	3.07029	0.106662
P8	0.231242	0.353918	0.240388	0.825007	0.382652	0.335767	0.809422	2.75497	0.107129
P9	0.17561	0.22423	0.505508	1.49839	0.695388	0.261564	0.636307	3.29965	0.0796839
mean	0.192846	0.281045	0.43418	1.31851	0.61123	0.275944	0.669972	3.013	0.108511
std	0.032995	0.0736696	0.105054	0.314646	0.144551	0.0410391	0.118603	0.39323	0.0165554
se	0.0109983	0.0245565	0.0350181	0.104882	0.0481838	0.0136797	0.0395344	0.131077	0.00551846
diff(LEAF-FOAM)	Gluteus maximus [x BW]	Biceps femoris CapLong [x BW]	Rectus femoris [x BW]	Vastus lateralis [x BW]	Vastus medialis [x BW]	Gastocnemius lateralis [x BW]	Gastocnemius medialis [x BW]	Soleus [x BW]	Tibialis anterior [x BW]
P1	0.0015285	0.00575673	-0.0529974	-0.130296	-0.0593707	-0.0425371	-0.0701254	-0.320386	-0.00741643
P2	0.012615	-0.031098	0.0224274	0.0308273	0.0141285	-0.0347821	-0.0360208	-0.171711	-0.0191851
P3	-0.00822593	-0.0148982	-0.0312062	-0.142264	-0.0642703	-0.037205	-0.0522631	-0.355936	0.0168315
P4	-0.00936875	-0.053012	0.0229304	-0.00635904	-0.00332362	-0.0171101	-0.0297604	0.0398476	-0.013688
P5	-0.0113501	-0.00347104	-0.0142006	-0.0778236	-0.0358187	-0.028676	-0.0236041	-0.232088	-0.00361204
P6	0.0114829	0.00332107	-0.00844813	-0.00646405	-0.00263499	-0.0196692	-0.00505744	-0.12185	-0.00654113
P7	-0.000786066	-0.0216312	0.00490937	-0.00869991	-0.00363222	-0.0346808	-0.0621255	-0.180194	-0.00981405
P8	-0.023918	-0.101663	0.0309683	0.0123724	0.00705703	-0.0748733	-0.173459	-0.377139	-0.00828327
P9	-0.0188803	-0.0623949	0.0310121	-0.0388389	-0.0171292	-0.035807	-0.0484103	-0.274219	0.00929772
mean	-0.00521141	-0.0310101	0.000599462	-0.0408384	-0.0183327	-0.036149	-0.0556473	-0.221519	-0.00471231
std	0.0125615	0.035527	0.0296353	0.062282	0.0284775	0.0167165	0.0485236	0.131046	0.0111864
se	0.00418715	0.0118423	0.00987844	0.0207607	0.00949251	0.00557218	0.0161745	0.0436819	0.00372881
%-Veränderung	-2.77742	-12.4023	0.137877	-3.19632	-3.09205	-15.0749	-9.05829	-7.93555	-4.53986
p-value	0.248496	0.0307182	0.9531	0.0847221	0.0895434	0	0.009	0.000963588	0.241897
Cohen's dz	-0.414874	-0.87286	0.0202279	-0.655702	-0.64376	-2.16247	-1.14681	-1.6904	-0.421252
